# Supplementary material
Source: ML conference proceedings conference paper supplement (https://openaccess.thecvf.com/content/ICCV2025/html/Di_DH-FaceVid-1K_A_Large-Scale_ICCV_2025_paper.html)
Supplement: Supplementary file 1 [file 09142_supp.pdf › 09142_supp.pdf]

1

Table 1. Comprehensive attribute list of DH-FaceVid-1K, including ethnicities, appearance details, emotions, actions, and lighting conditions.

| Static Attributes      |                  |                  |                 |              |                  |
|------------------------|------------------|------------------|-----------------|--------------|------------------|
| (a) Ethnicities        |                  |                  |                 |              |                  |
| Asian                  | White            | Indian           | European        | African      | Arab             |
| Latino                 | Chinese          | Japanese         | Korean          | Latina       | Jewish           |
| Mexican                |                  |                  |                 |              |                  |
| (b) General Appearance |                  |                  |                 |              |                  |
| No beard               | Male             | Female           | Straight hair   | Black hair   | Anchored eyebrow |
| Short hair             | Eyeglasses       | Brown hair       | Rosy cheeks     | Long hair    | Bush eyebrow     |
| Chubby                 | Heavy makeup     | Oval face        | Lipsticks       | Big nose     | Wavy hair        |
| Bangs                  | Double chin      | Side burn        | Earrings        | Goatee       | White hair       |
| Blonde hair            | Bald             | Old              | Narrow eyes     | Big lips     | Pale skin        |
| Wearing shirt          | Wearing jacket   | Wearing suit     | Wearing tie     | Wearing coat | Wearing blazer   |
| Wearing hoodie         | Redhead          | Wearing cloak    | Wearing bonnet  | Blemish      | Pompadour        |
| Mustache               | Wearing necklace | Wearing sweater  | Wearing blouse  | Wearing cap  | Wearing scarf    |
| Wearing hat            | Wearing dress    | Wearing headband | Mole            | Wearing vest | Tattoos          |
| Wearing sunglasses     | Piercings        | Wearing beanie   | Wearing hijab   | Ponytail     | Scars            |
| Wearing robe           | Tan              | Wearing ring     | Wrinkles        | Wearing hood | Wearing backpack |
| Wearing bandana        | Braids           | Wearing turban   | Pigtails        | Dreadlocks   | With purse       |
| (c) Light Conditions   |                  |                  |                 |              |                  |
| Dark                   | Outdoor          | Bright           | Natural         | Artificial   | Dim              |
| Daylight               | Normal           |                  |                 |              |                  |
| Dynamic Attributes     |                  |                  |                 |              |                  |
| (a) Action             |                  |                  |                 |              |                  |
| Talk                   | Smile            | Wag Head         | Frown           | Gaze         | Nod              |
| Shake Head             | Sing             | Glare            | Close Eyes      | Laugh        | Whisper          |
| Wink                   | Shout            | Sigh             | Listen To Music | Yawn         | Cough            |
| Sneeze                 | Study            | Speak            | Sleep           | Kiss         | Pile             |
| Stand                  | Think            | Eat              | Drink           | Read         | Touch            |
| Roll                   | Rest             | Work             | Wash            | Ride         | Drive            |
| Play                   | Hold             | Throw            | Run             | Clutch       | Tilt             |
| Hug                    | Walk             |                  |                 |              |                  |
| (b) Emotion            |                  |                  |                 |              |                  |
| Neutral                | Happy            | Sad              | Angry           | Fear         | Surprise         |
| Contempt               | Disgust          |                  |                 |              |                  |

After obtaining the initial annotations, we **employed** an additional 50 annotators to review the text. These annotators **were tasked** with assessing static information in the annotations, such as age, ethnicity, clothing, and facial accessories, based on the first frame of the video. Subsequently, they **evaluated** dynamic information, such as emotional and movement changes, based on three randomly selected non-consecutive additional frames.

The comprehensive attribute list of DH-FaceVid-1K is presented in Table 1. We visualized some high-frequency words in the annotations. The word cloud can be found in Figure 3.

## D. Challenges

Although our primary goal is to construct a high-quality talking face dataset mainly composed of Asians to address the scarcity of such datasets, the statistical data presented in the main text **indicated** a certain long-tail distribution in racial representation. However, through experiments, we discovered that by integrating our proposed dataset with cleaned open-source data and thoroughly training powerful video generation models, such as CogVideoX, it **was** still easy to generate high-quality data for Caucasian, African,

and Indian individuals.

In terms of actions and emotions, talking and neutral emotions **dominated** overwhelmingly. Nevertheless, we **found** that even a small proportion of data **was** sufficient for the model to learn, given our total duration of nearly 1200 hours. Qualitative experimental images for other ethnicities, scenes, emotions, and actions, such as smiling, can be found in the later sections.

## E. Training Protocol

To validate the effectiveness and superiority of the proposed dataset, we evaluated the performance of generative models under different architectures based on T2V (Text-to-Video) and I2V (**Image-to-Video**) in the earlier experimental sections. All model training **was conducted** separately using CelebV-Text and DH-FaceVid-1K as the training datasets.

We **aimed** to replicate these methods according to the training details provided officially, including the optimizer, learning rate, and loading the official weight checkpoints. All models **were fine-tuned** for 100k steps using eight A800 GPUs. However, for SVD, since the official training code is not open-sourced, we **trained** it based on a third-party reproduced code.

For OpenSora, we **fine-tuned** using version 1.2. For EasyAnimate, we **used** version v3 for fine-tuning. However, this version often **encountered** crashes when fine-tuning with large datasets. Our solution **was** to reduce the learning rate (down to  $2e-6$ ) and frequently save checkpoints, allowing us to revert to the most recent stable checkpoint in case of a crash.

## F. Quantitative Experiment Settings

We **utilized** FVD, FID, and **CLIPScore** to evaluate video temporal consistency, individual frame quality, and the relevance between the generated video and text prompt. Before training different models, we randomly **selected** 2048 videos from each of the two training datasets as the test set, which **were** not involved in training. For Text-to-Video (T2V) generation experiments, we **generated** 2048 videos as the “fake” videos to calculate FVD and **CLIPScore**, based on the prompts of the test set. Subsequently, to compute FID, we uniformly **sampled** 4 frames from each of these 2048 “fake” videos as fake data and **applied** the same procedure to the test data. In total, we **had** 8192 images for both real and fake data. For Image-to-Video (I2V), we **took** the first frame from the test set images as the image prompt to **generate** 2048 videos as fake data, with other settings similar to the T2V experiments.

To ensure the fairness of the comparison, all real and fake data **were** uniformly resized to  $512 \times 512$ .

## G. More Qualitative Results

We present additional qualitative results that were not covered in the main text. For the Text-to-Video experiments, we first **used** more diverse prompts, such as different emotions, ethnicities, actions, and scenes, to generate results. We then **included** generation results from prompts with formats different from those in the dataset annotations, such as prompts lacking key information or using single-word descriptions of character traits in the video. This demonstrates that our model, after thorough training, possesses strong generalization capabilities. For Image-to-Video (I2V), we **used** some “wild” data to generate results, verifying that the model, trained on our dataset, still exhibits good extrapolation abilities. The additional qualitative experimental results in this section **were generated** using the CogVideoX 5b version and **OpenSora**.

## H. Comparison using Vbench

We conducted a comparative analysis of aesthetic scores and image quality metrics between DH-FaceVid-1K, CelebV-HQ, and CelebV-Text using VBench [1], as illustrated in Figure 4. The results demonstrate that the proposed DH-FaceVid-1K dataset achieves comparable aesthetic per-

Table 2. Comparison of T2V metrics on cross-dataset evaluation.

| Dataset     | FID ( $\downarrow$ ) | FVD ( $\downarrow$ ) | CLIP ( $\uparrow$ ) | DSL-FIQA ( $\uparrow$ ) |
|-------------|----------------------|----------------------|---------------------|-------------------------|
| CelebV-Text | 25.71                | 313.51               | 0.838               | 0.7531                  |
| Ours        | <b>22.81</b>         | <b>250.53</b>        | <b>0.845</b>        | <b>0.8204</b>           |

Table 3. User study measured by Mean Opinion Scores.

| Datasets    | Adherence   | Naturalness | Visual Quality | Overall     |
|-------------|-------------|-------------|----------------|-------------|
| CelebV-HQ   | 2.53        | 4.01        | 3.75           | 3.90        |
| CelebV-Text | 2.89        | 3.88        | 4.17           | 4.01        |
| Ours        | <b>4.52</b> | <b>4.39</b> | <b>4.33</b>    | <b>4.47</b> |

formance while exhibiting superior image quality relative to the benchmark datasets.

## I. Combination with Existing Datasets

Our dataset includes 200h of Caucasian and African data, with diverse generation examples shown in Appendix Figures 13-16. Given that existing public datasets already contain extensive non-Asian data (about 4.5k h), we recommend using either equal-duration sampling (1:1) or **population-proportional splits** to ensure generalization and racial diversity.

## J. Cross Reference-Dataset Evaluation

We **conducted** cross-dataset evaluation using CogVideoX-2B T2V to assess the generalization capability of our dataset. The evaluation sets include HDTF and CelebV-HQ (at a 1:3 ratio, with results reported in Table 2). Our dataset demonstrates strong generalizability and consistently outperforms CelebV-Text across all metrics.

## K. User Study

We **conducted** a user study with 25 participants to evaluate CogVideoX’s T2V face generation performance after fine-tuning. Participants **compared** 30 videos generated with the same prompt by models trained on CelebV-HQ, CelebV-Text, and the proposed dataset. The prompts **included** diverse ethnic groups and **emotions** (**neutral:happy:angry:sad = 6:1:1:1**) in various settings. Evaluations **focused** on prompt adherence, face naturalness, video quality, and overall quality. As shown in Table 3, videos using our fine-tuned weights **scored** the highest overall.

## L. Future Work

Our proposed dataset primarily focuses on talking faces, and when combined with powerful open-source models, it already enables robust and diverse talking face generation capabilities. However, there are still limitations, such as the video’s restriction to facial expressions without including common actions like eating or crying. On the other hand, our current dataset contains a limited number of non-East

164 Asian faces. To further enhance data diversity, we are ac-  
165 tively collecting additional Asian facial data from regions  
166 beyond East Asia (including Indian, Indonesian, Malay, and  
167 Vietnamese populations), while strictly adhering to data pri-  
168 vacy protocols.

169 Our future work will focus on developing datasets that  
170 support digital human generation for both half-body and  
171 full-body models, aiming to achieve true digital human syn-  
172 thesis.

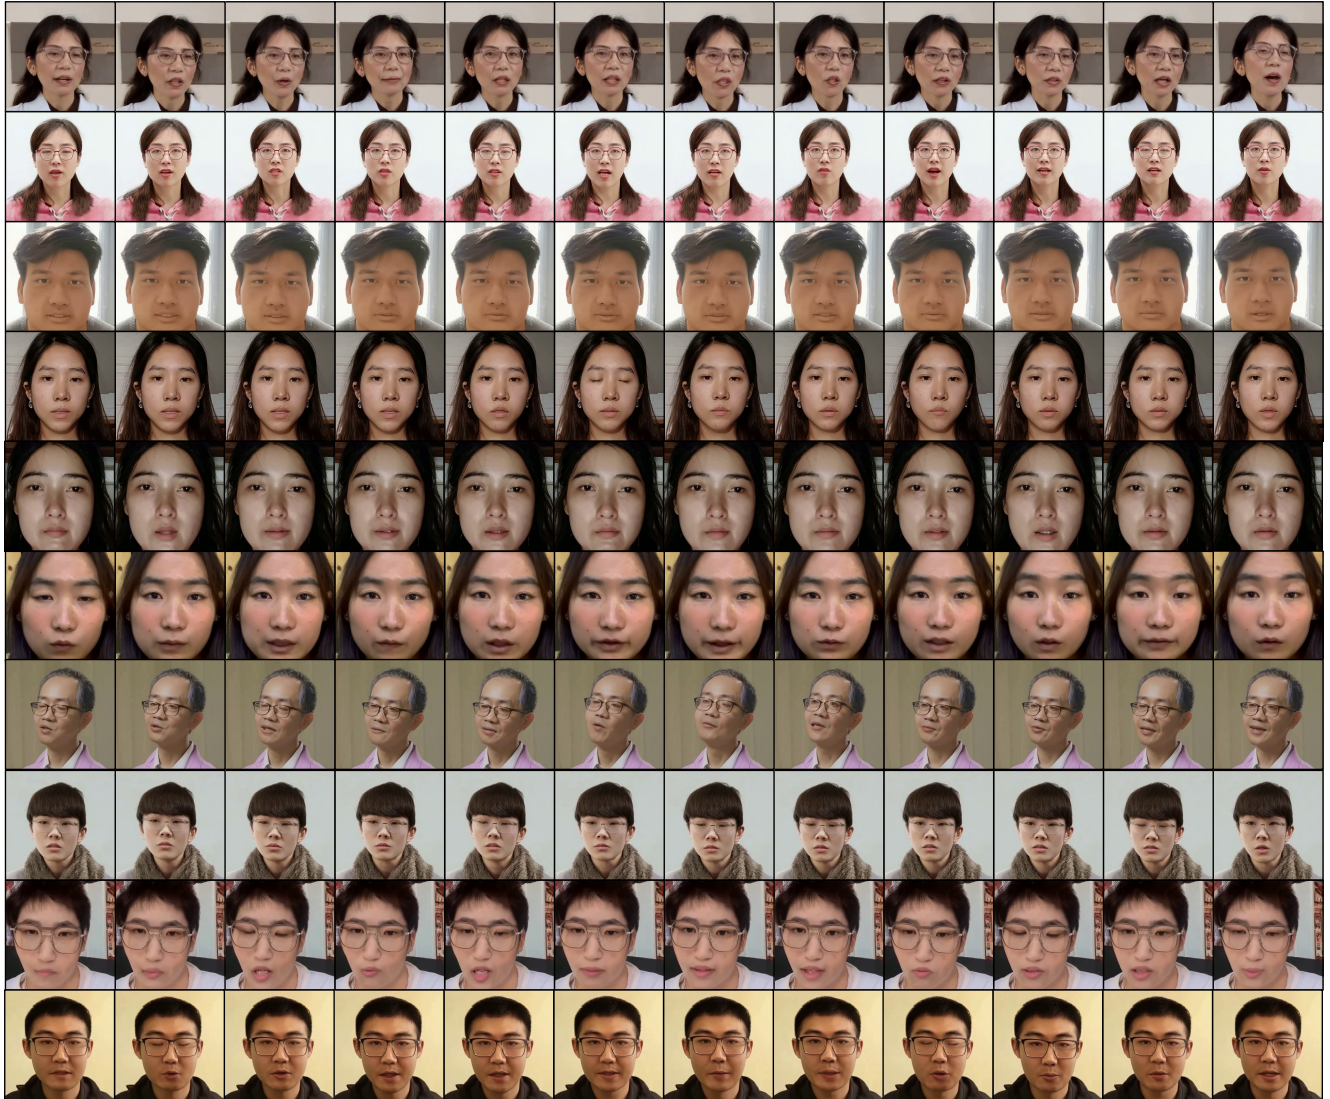

Figure 5. More qualitative T2V evaluation results from CogVideoX demonstrate the effectiveness of the DH-FaceVid-1K fine-tuned model in **generating videos** from different angles and facial distances.

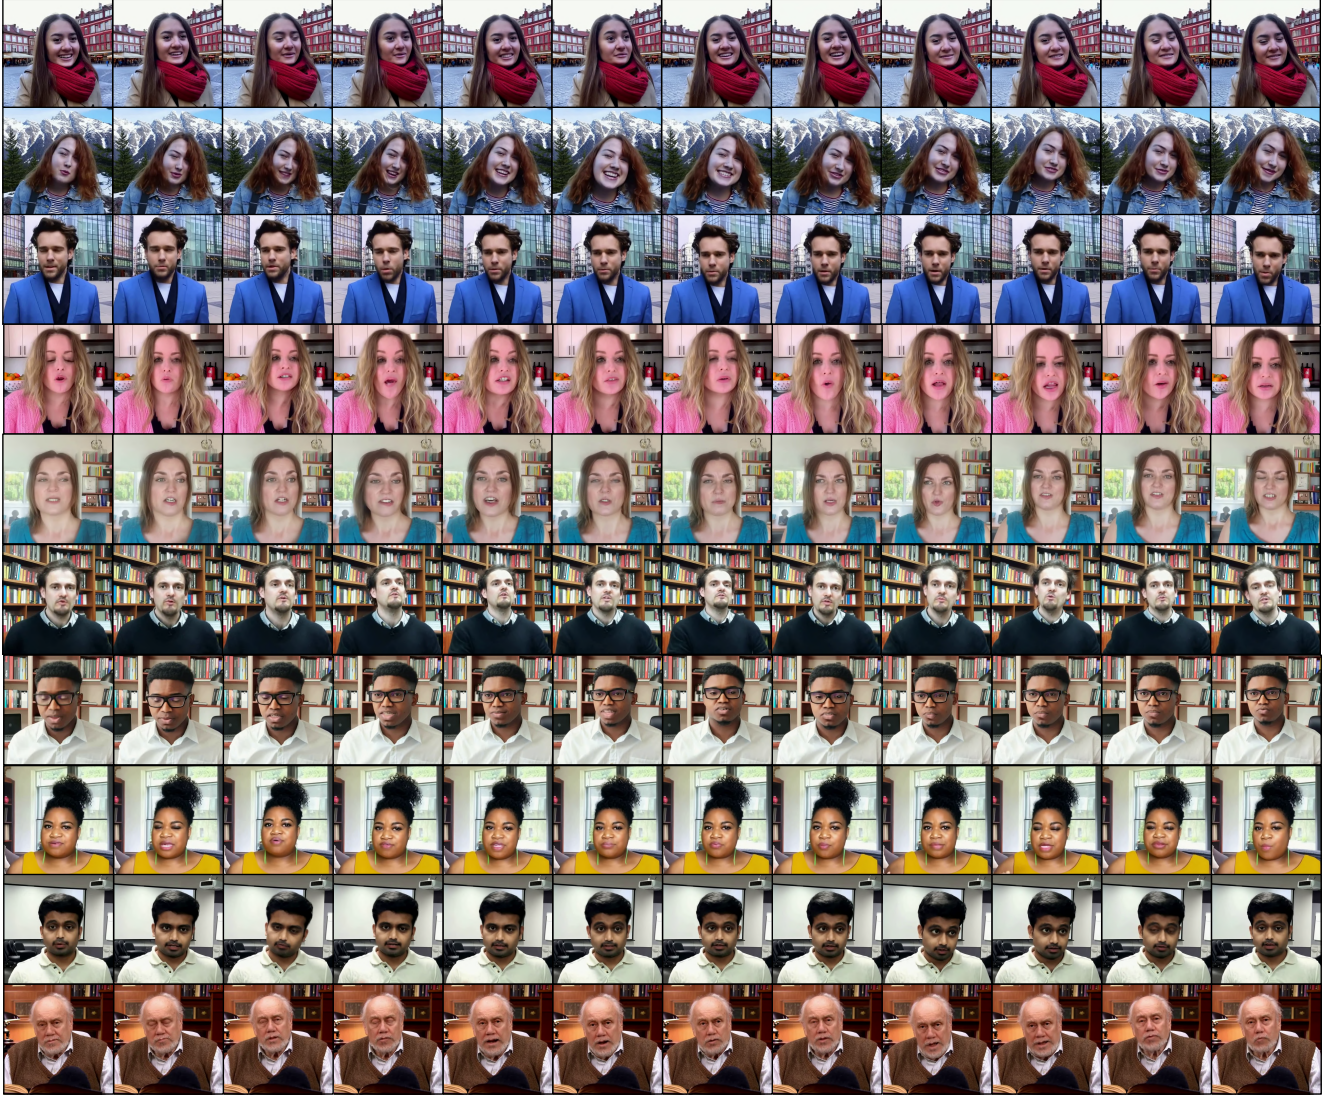

Figure 6. More qualitative T2V evaluation results from OpenSora confirm that the DH-FaceVid-1K fine-tuned model retains the ability to generate speaking videos of faces from multiple ethnicities, including Caucasian, African, and Indian.

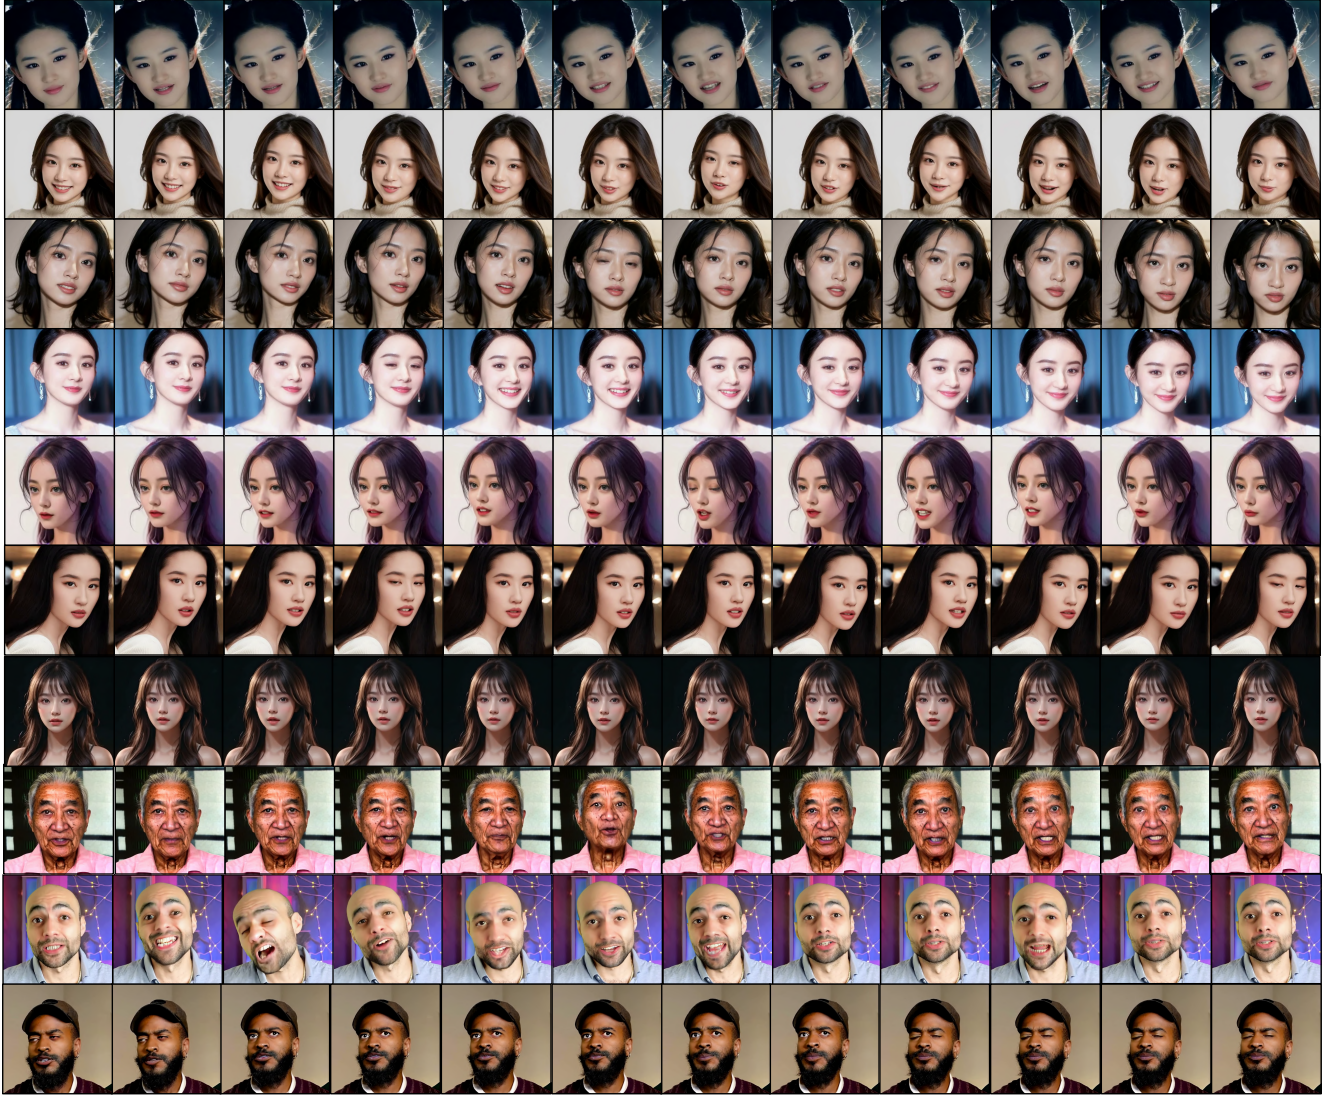

Figure 7. More qualitative I2V evaluation results from CogVideoX confirm that the DH-FaceVid-1K fine-tuned model retains the ability to generate various styles (realistic and cartoon) across multiple ethnicities.

173  
174  
175  
176

## References

- [1] Ziqi Huang, Yinan He, Jiashuo Yu, et al. VBench: Comprehensive benchmark suite for video generative models. In *CVPR*, 2024. [3](#)

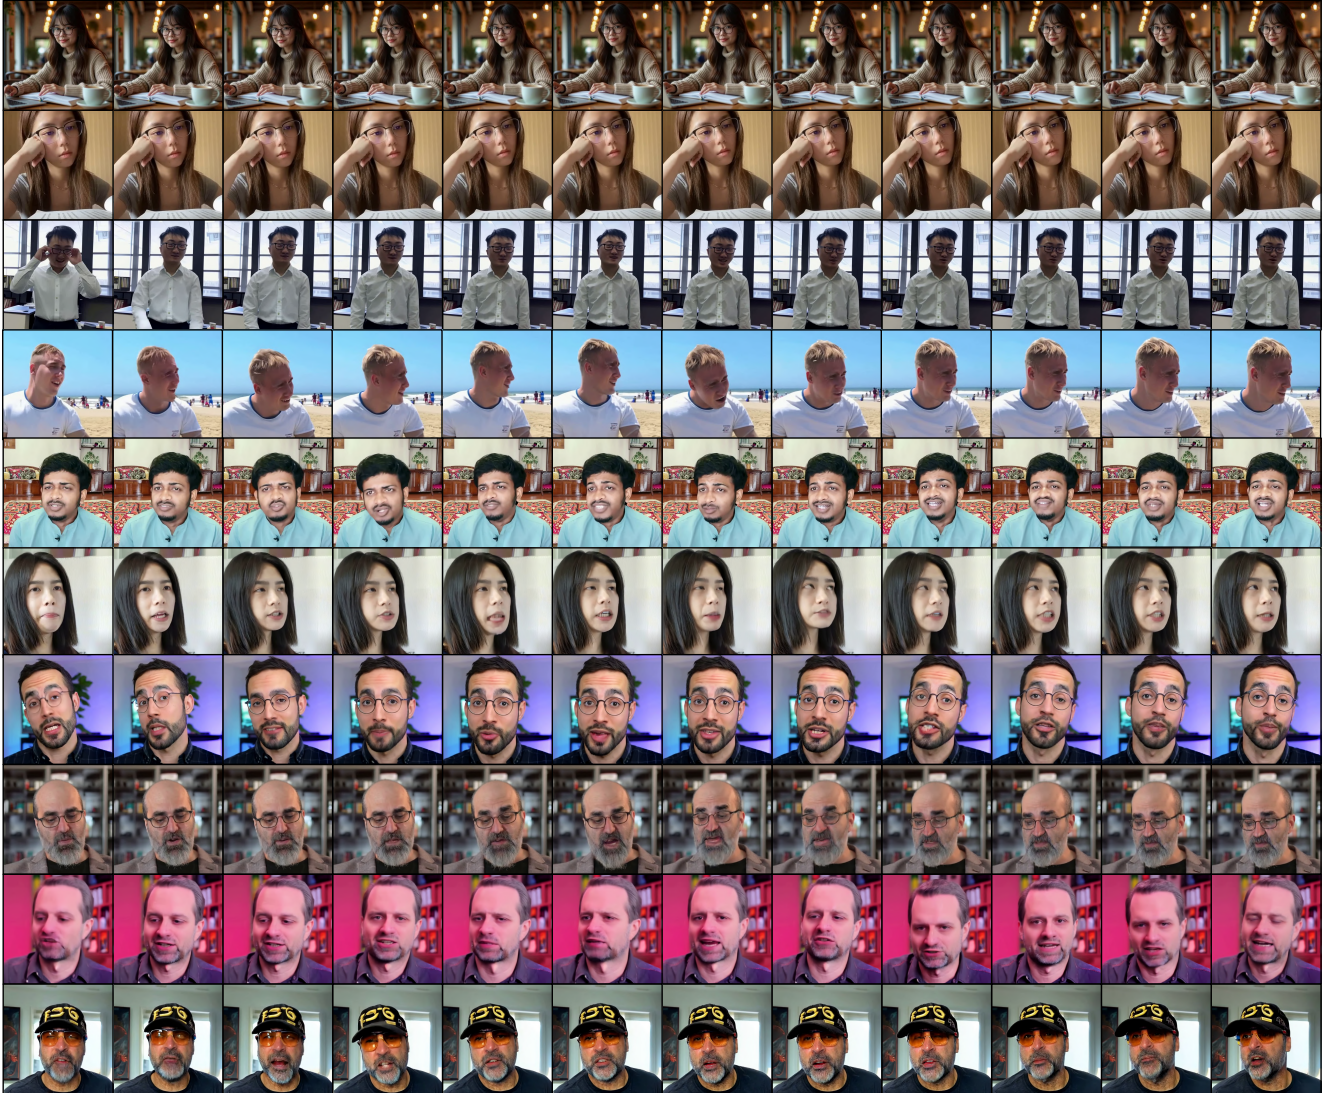

Figure 8. More qualitative I2V evaluation results from CogVideoX confirm that the DH-FaceVid-1K fine-tuned model retains the ability to generate not only speaking but also various other actions, such as reading, and can produce half-body images beyond just the face, across multiple ethnicities.
